# Supplementary material for: Multifunctional oxidosqualene cyclases and cytochrome P450 involved in the biosynthesis of apple fruit triterpenic acids
Source: PubMed Central journal article supplement (PMC5089662; doi:10.1111/nph.13996), 2016-05-23
Supplement: NPH-211-1279-s001.pdf [file NPH-211-1279-s001.pdf]

## ***New Phytologist* Supporting Information Figs S1–S6 and Tables S1 & S2**

Article title: Multifunctional oxidosqualene cyclases and cytochrome P450 involved in the biosynthesis of apple fruit triterpenic acids

Authors: Christelle M. Andre, Sylvain Legay, Amélie Deleruelle, Niels Nieuwenhuizen, Matthew Punter, Cyril Brendolise, Janine M. Cooney, Marc Lateur, Jean-François Hausman, Yvan Larondelle and William A. Laing

Article acceptance date: 29 March 2016

The following Supporting Information is available for this article:

**Fig. S1** Chromatograms of typical LC-APCI-MS analysis of the products of MdOSC3.

**Fig. S2** Expression analysis of triterpene biosynthetic genes (MdOSC1, MdOSC3, MdOSC4, MdOSC5) by real-time qPCR on RNA extracted from apple skin tissues.

**Fig. S3** Mass spectra of lupeol, germanicol,  $\beta$ -amyrin, and  $\alpha$ -amyrin.

**Fig. S4** Chromatographic trace of extract of *Nicotiana benthamiana* leaf transiently transformed with MdOSC4 and the same sample spiked with taraxerol.

**Fig. S5** Alignment of P450 predicted amino acid sequences from apple (CYP716A175) and other species.

**Fig. S6** Mass spectra comparison (MS1, MS2, and MS3) between betulinic acid, ursolic acid, oleanolic acid, and a putative morolic acid.

**Table S1** Primer sequences and properties of triterpene-related and housekeeping genes in this study.

**Table S2** Summary of the skin triterpene composition of 20 apple cultivars

**Table S1** Primer sequences and properties of triterpene-related and housekeeping genes used to (a) isolate oxidosqualene cyclases and (b) used on the panel of 20 apple cultivars

**(a) Primers used to isolate Oxidosqualene Cyclases**

| Primer name     | Sequence                                             |
|-----------------|------------------------------------------------------|
| attB1 F_OSC4_MR | GGGGACAAGTTTGTACAAAAAAGCAGGCTCCATGTGGAAGCTTAAGGTCG   |
| attB2 R_OSC4_MR | GGGGACCACTTTGTACAAGAAAGCTGGGTCTAATCACGCTTTGGAAGG     |
| attB1 F_OSC5_RG | GGGGACAAGTTTGTACAAAAAAGCAGGCTCCATGTGGAAGCTTAAGGTCG   |
| attB2 R_OSC5_RG | GGGGACCACTTTGTACAAGAAAGCTGGGTTTAGACATCAACAAATGGAACCC |

**(b) Primers used to measure gene expression by PCR**

| Genes | Accession Number | Primer Sequences (5'-3')                              | Size (bp) | T <sub>m</sub> (°C) | E     | References                  |
|-------|------------------|-------------------------------------------------------|-----------|---------------------|-------|-----------------------------|
| eF-1α | AJ223969.1       | F: ACTGTTCCCTGTTGGACGTGTTG<br>R: GAGTTGGAAGCAACGTACCC | 208       | 82.5                | 1.861 | Giorno <i>et al.</i> (2012) |

|         |            |                                                                              |       |      |       |                                 |
|---------|------------|------------------------------------------------------------------------------|-------|------|-------|---------------------------------|
| IMPA-9  | CN909679   | F : TCGTGAACTCAGGCGCTTACTG<br>R : AAGCAACGGTAAAGCGGGCAAC                     | 205   | 83.5 | 1.953 | Giorno <i>et al.</i> (2012)     |
| MdGAPDH | EB146750   | F : TGAGGGCAAGCTGAAGGGTATCTT<br>R: TCAAGTCAACCACACGGGTACTGT                  | 185   | 82.5 | 1.874 | Malladi & Hirst (2010)          |
| MdACTIN | EB127077   | F: ACCATCTGCAACTCATCCGAACCT<br>R: ACAATGCTAGGGAACACGGCTCTT                   | 185   | 82   | 1.919 | Malladi & Hirst (2010)          |
| MdOSC1  | FJ032006.1 | F :<br>TTGTACTACTAATCCAGTGATCAAGATGTGG<br>R : CTCTCTTAGTATCTGAAAACGCCATAGGAG | : 238 | 84   | 1.857 | Brendolise <i>et al.</i> (2011) |
| MdOSC3  | FJ032008.1 | F : GCAATCGTGATCAAAGAAGATGTGGAGG<br>R : TTCTCTTAAAATCTGAAAACGCCATAGG         | 232   | 84   | 1.882 | Brendolise <i>et al.</i> (2011) |
| MdOSC4  | KT383435   | F : CTCTCGAAGTAACAATGAAGCACA                                                 | 124   | 79   | 1.864 |                                 |

R : TAATCACCATTTGGGTCTTCAG

MdOSC5 KT383436

F : TATGCATCCAGCAAAAATGTTT

152

77.5

1.851

R : TCCAATTAATTTCCGCCATAAGGT

CYP716A17 EB148173

F : AGGCACGTTCCCTCGCTTC

70

77.5

1.974

5

R : CAAACCCTAAGAGGAGGGTCA

---

**Table S2** Summary of the skin triterpene composition of 20 apple cultivars separated into three russeting groups: russeted (four cultivars), semi-russeted (nine cultivars), and waxy (seven cultivars)

|                             | Total Triterpenes | Triterpene Acids (nmol g <sup>-1</sup> DW) |                   |                    | Triterpene-caffeates (nmol g <sup>-1</sup> DW) |                                  |                                |
|-----------------------------|-------------------|--------------------------------------------|-------------------|--------------------|------------------------------------------------|----------------------------------|--------------------------------|
|                             |                   | Ursolic acid                               | Oleanolic acid    | Betulinic acid     | Oleanolic acid -3-trans-caffeate               | Betulinic acid -3-trans-caffeate | Betulinic acid -3-cis-caffeate |
| <b><i>Russeted</i></b>      |                   |                                            |                   |                    |                                                |                                  |                                |
| Average                     | 6899 <sup>a</sup> | 1569 <sup>a</sup>                          | 800 <sup>a</sup>  | 1628 <sup>b</sup>  | 416 <sup>b</sup>                               | 2115 <sup>c</sup>                | 371 <sup>c</sup>               |
| Min–Max                     | 4971–8075         | 670–2802                                   | 500–1270          | 1094–2095          | 248–511                                        | 1287–3722                        | 266–586                        |
| <b><i>Semi-russeted</i></b> |                   |                                            |                   |                    |                                                |                                  |                                |
| Average                     | 5567 <sup>a</sup> | 1981 <sup>ab</sup>                         | 1515 <sup>b</sup> | 1028 <sup>ab</sup> | 205 <sup>b</sup>                               | 693 <sup>b</sup>                 | 145 <sup>b</sup>               |
| Min–Max                     | 4228–7636         | 1464–2504                                  | 991–1974          | 527–1712           | 72–406                                         | 291–1312                         | 68–257                         |
| <b><i>Waxy</i></b>          |                   |                                            |                   |                    |                                                |                                  |                                |
| Average                     | 5864 <sup>a</sup> | 2839 <sup>b</sup>                          | 2045 <sup>b</sup> | 687 <sup>a</sup>   | 90 <sup>a</sup>                                | 159 <sup>a</sup>                 | 45 <sup>a</sup>                |
| Min                         | 3562–7379         | 1680–3816                                  | 1203–2540         | 324–834            | 23–175                                         | 82–252                           | 25–73                          |

Data are expressed in nmol g<sup>-1</sup> DW. Data were obtained after HPLC-DAD analysis as described in the Materials and Methods section. Averages with no letter in common within a column are significantly different ( $P < 0.05$ ; One-way ANOVA, Tukey's pairwise results).

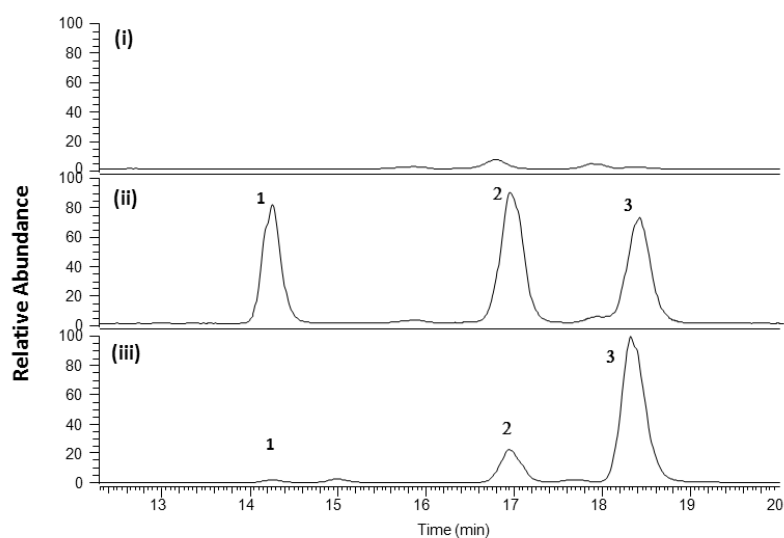

**Fig. S1** Chromatograms of typical LC-APCI-MS analysis of the products of MdOSC3 (iii) after transient expression in *Nicotiana benthamiana*, following the methodology described in the Materials and Methods section. p19 was used as a negative control (i) and mixed with authentic standards at  $20 \mu\text{g ml}^{-1}$  (1, lupeol; 2,  $\beta$ -amyirin; 3,  $\alpha$ -amyirin) (ii). Compounds were identified and quantified on the basis of their mass spectral data (Fig. S3). Chromatograms are presented as selected ion plots of the  $m/z$  409.8  $[MH-H_2O]^+$  ion.

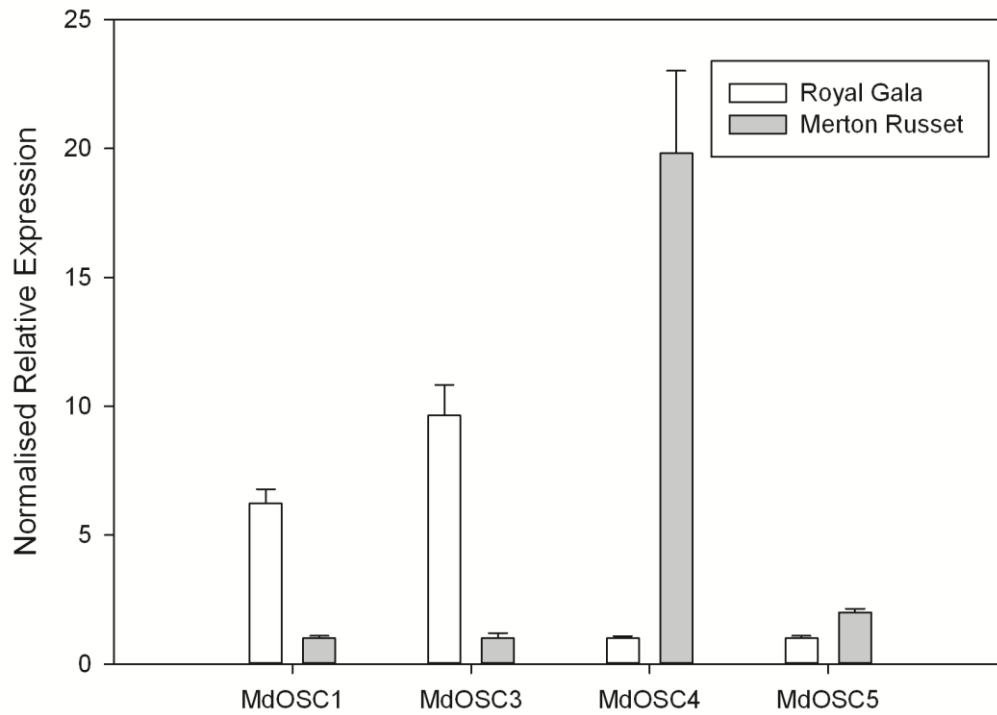

**Fig. S2** Expression analysis of triterpene biosynthetic genes (MdOSC1, MdOSC3, MdOSC4, MdOSC5) by real-time qPCR on RNA extracted from apple skin tissues. Error bars show SE ( $n = 3$ ).

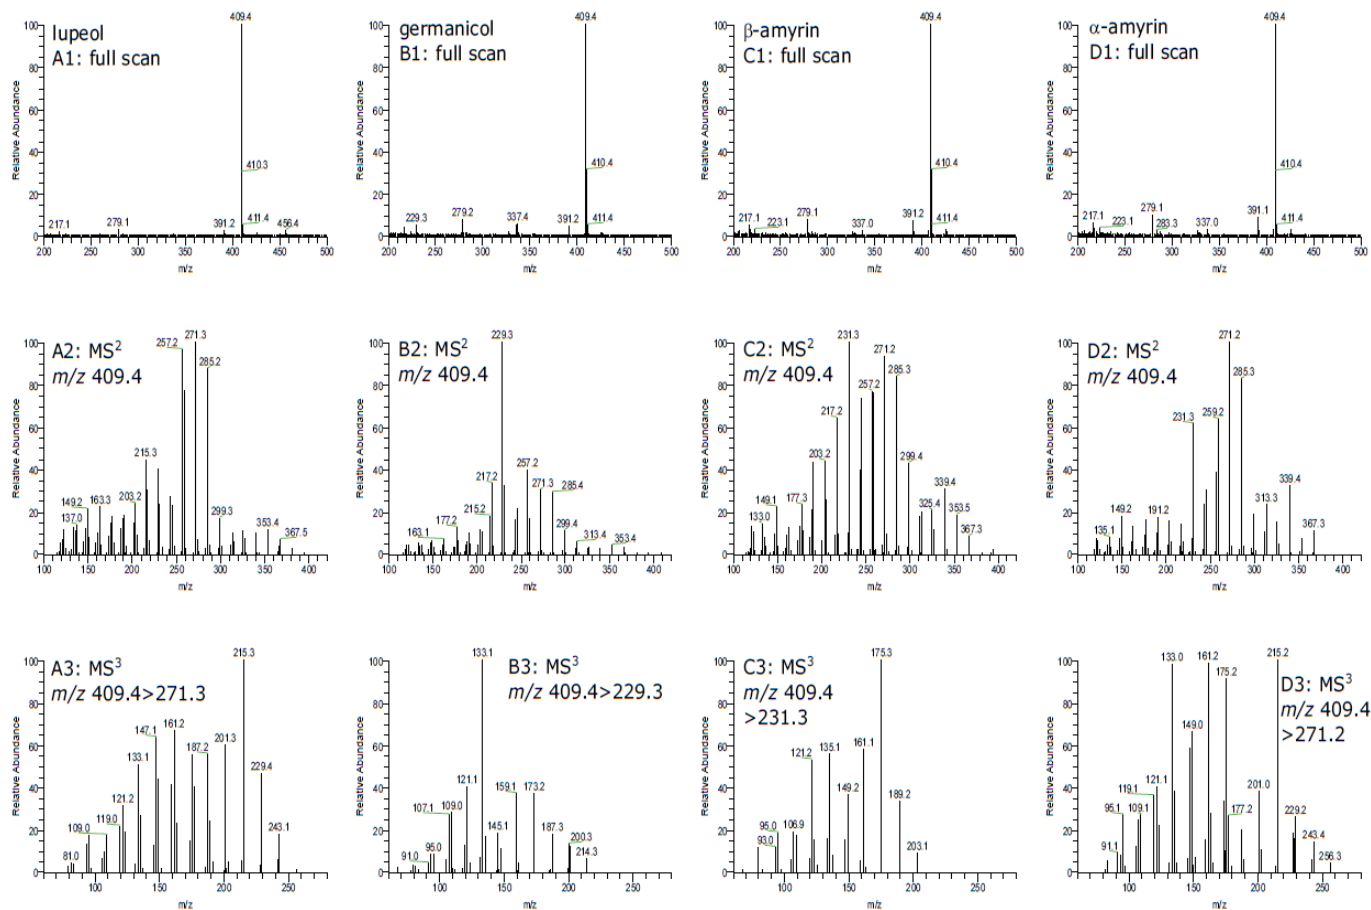

**Fig. S3** Mass spectra comparison (MS1, MS2, and MS3) between lupeol, germanicol,  $\beta$ -amyrin, and  $\alpha$ -amyrin.



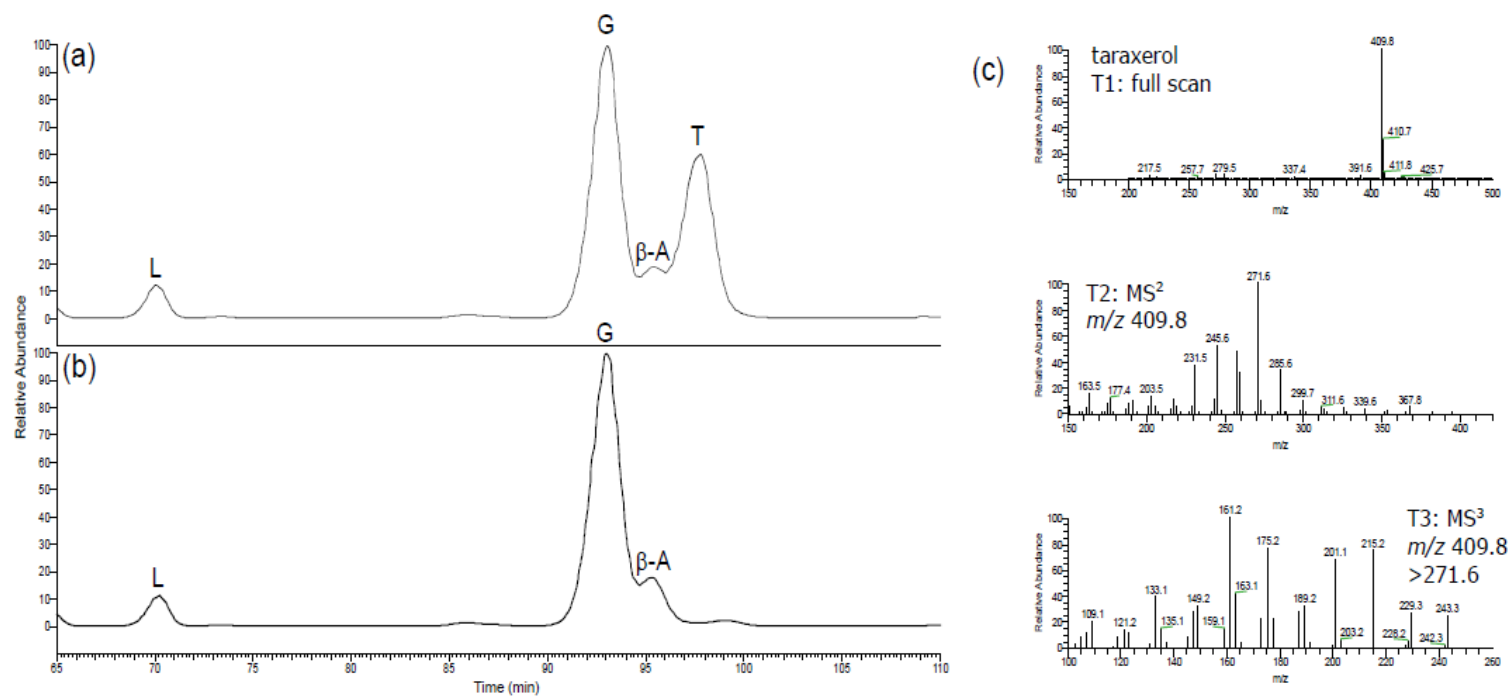

**Fig. S4** Chromatographic trace of extract of *Nicotiana benthamiana* leaf transiently transformed with MdOSC4 (b) and the same sample spiked with taraxerol (T) (a) showing no taraxerol in the leaf sample. Mass spectra of the taraxerol peak (MS1, MS2, and MS3) (c). Transient expression of MdOSC4 (b) led to the formation of germanicol (G),  $\beta$ -amyrin ( $\beta$ -A), and lupeol (L). The presence of taraxerol (T) could therefore be excluded.

**Fig. S5** Alignment of P450 predicted amino acid sequences from apple (CYP716A175) and other species. The prefix is the cytochrome P450 designation, and the suffix identifies the species as follows: At, *Arabidopsis thaliana*; Aa, *Artemisia annua*; Mt, *Medicago truncatula*; Vv, *Vitis vinifera*; Cp, *Carica papaya*; Pt, *Populus trichocarpa*; St, *Solanum tuberosum*; Nt, *Nicotiana tobaccum*. GenBank (GB) numbers (or Arabidopsis identifiers) in the order listed in the alignment are: AT5G36140 (CYP716A2-At), AT5G36110 (CYP716A1-At), XP\_002264643 (CYP716A20-Vv), XP\_002280969.1 (CYP716A19-Vv), XP\_002309057.1 (CYP716A8-Pt), ABC94483.1 (CYP716A14-Aa), XP\_002324668.2 (CYP716A3-Pt), XP\_002325241 (CYP716A6-Pt), XP\_006338129 (CYP716A13-St), no GB identifier (CYP716A36-Nt), CBN88268.1 (CYP716A12-Mt), BAJ84106 (CYP716A15-Vv), BAJ84106 (CYP716A17-Vv), no GB identifier (CYP716A16-Cp). The text/background colour code refers to the degree of similarity between the different sequences: red/yellow, identical; dark blue/turquoise, conservative; black/green, block of similar; black/white, nonsimilar.

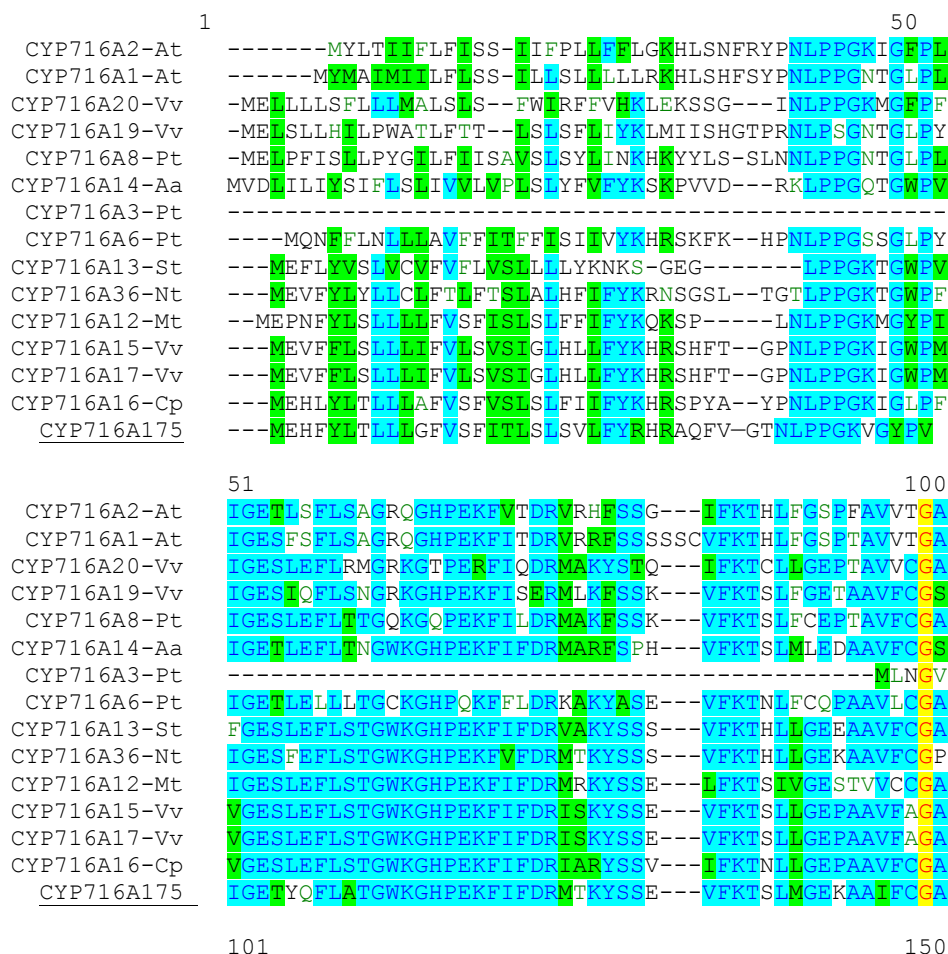

CYP716A2-At **SGNKFLFTNENKLVISWWDSDVSNKIFPSS**TQTSSK-EEAIK**TRM**LLMPS**V**  
 CYP716A1-At **SGNKFLFTNENKLVSWWDSDVSNKIFPSS**MQTSSK-EEAR**KTRM**LLSQ**F**  
 CYP716A20-Vv **AGNKLLFSNENKLVTSWWRSEVEKIFPSS**LQTS**TK**-EES**MR**TRK**LLP**AF**L**  
 CYP716A19-Vv **AGNKFLFSNENKLVTAWWDSDVSNKIFPSS**LQTS**SQ**-EES**SKMR**KL**LP**GF**L**  
 CYP716A8-Pt **AGNKFLFSNENKLVTAWWDSDVSNKIFPSS**QQTSS**Q**-EES**SKMR**KL**LP**FF**L**  
 CYP716A14-Aa **AGNKFLFSNENKLVKAWWFASVEKILPS**AKET**T**N**Q**------**RKML**SR**S**F  
 CYP716A3-Pt **AGNKFLFSNENLVETWWEFEVSNKIFPS**A**VEK**SP**K**-EEA**KR**MR**LL**FP**PF****L**  
 CYP716A6-Pt **AGNRFLFSNKNKVLKAWYDFVCKIFPSS**VQR**PLI**-EQVD**RLR**T**LL**PE**LL****L**  
 CYP716A13-St **SGNKFLFSNENKLVQAWWFENSVNKVFPSS**TQTSSK-EEA**I**K**MR**KL**LP**N**F****F**  
 CYP716A36-Nt **TCNKFLFSNENKLVQAWWFENSVNKVFPSS**TQTSSK-EEA**I**K**MR**KL**LP**N**F****F**  
 CYP716A12-Mt **ASNKFLFSNENKLVTAWWDSDVSNKIFP**TT**S**LD**S**N**L**KE**S**I**K**MR**KL**LP**Q**F**F**  
 CYP716A15-Vv **AGNKFLFSNENKLVHAWWFSSVDKVFPS**S**T**QTSSK-EEA**K**MR**KL**LP**Q**F**F**  
 CYP716A17-Vv **AGNKFLFSNENKLVHAWWFSSVDKVFPS**S**T**QTSSK-EEA**K**MR**KL**LP**Q**F**F**  
 CYP716A16-Cp **ACNKFLFSNENKLVTAWWFENSVNKIFP**TS**L**QTS**S**I-EE**S**K**MR**KL**LP**Q**F****L**  
 CYP716A175 **ACNKFLFSNENKLVTAWWFENSVNKVFP**SS**L**ET**S**A**K**-EEA**K**MR**KL**LP**N**F**F****M**

CYP716A2-At **KPEALRRYVGVMD**EIAQ**R**HE**E**TE**W**AN**Q**D**Q**L**V**FP**L**T**K**K**F**T**S**I**A**CR**L**F**L**S  
 CYP716A1-At **KPEALRRYVGVMD**EIAQ**R**HE**E**TE**W**AN**Q**D**Q**V**L**VP**L**T**K**K**F**T**S**I**A**CR**S**F**L**S  
 CYP716A20-Vv **KPEALQRYV**GIM**D**SIA**K**W**H**LD**N**H**W**LD**N**E**T**V**T**VP**L**AK**Q**Y**T**F**M**W**A**CR**L**F**L**S  
 CYP716A19-Vv **KPEALQRYI**SIM**D**VIAQ**R**HE**E**S**S**W**N**N**K**E**V**T**V**FP**L**AK**M**F**T**W**L**A**C**R**L**F**L**S  
 CYP716A8-Pt **KPESLRQYI**SV**M**DVIAQ**R**H**L**AS**D**W**E**G**K**Q**E**V**S**V**F**FP**L**AK**T**Y**T**W**L**A**C**R**L**F**L**S  
 CYP716A14-Aa **RPESLRQYV**PM**D**MAQ**R**H**E**K**T**E**W**D**G**M**D**Q**L**V**T**H**E**V**T**Q**N**F**T**F**S**I**A**CK**I**F**V**S  
 CYP716A3-Pt **KPEALRRYIG**TMD**M**V**T**K**R**H**F**A**L**E**W**G**N**K**A**E**V**V**V**FP**L**AK**S**Y**T**F**E**L**A**C**R**L**F**V**S**  
 CYP716A6-Pt **RPDALKRYV**GI**F**DK**A**GR**H**F**A**S**E**W**E**N**K**K**V**V**V**FP**L**AK**R**F**T**F**L**A**C**S**L**F**L**S  
 CYP716A13-St **KPEALQRYV**GIM**D**H**I**T**Q**R**H**F**A**S**G**W**E**N**K**E**Q**V**V**FP**L**T**K**R**Y**T**F**W**L**A**C**R**L**F**L**S  
 CYP716A36-Nt **KPEALQRYV**GIM**D**H**I**AQ**R**H**F**A**S**S**W**E**N**K**N**O**E**V**V**FP**L**AK**R**Y**T**W**L**A**C**R**L**F**V**S  
 CYP716A12-Mt **KPEALQRYV**GV**M**DVIAQ**R**HE**V**H**W**D**N**K**N**E**T**V**V**Y**P**LAK**R**Y**T**F**L**L**A**C**R**L**F**M**S**  
 CYP716A15-Vv **KPEALQRYI**GIM**D**H**I**AQ**R**H**F**A**D**S**W**D**N**R**D**E**V**I**V**FP**L**AK**R**F**T**W**L**A**C**R**L**F**M**S  
 CYP716A17-Vv **KPEALQRYI**GIM**D**H**I**AQ**R**H**F**A**D**S**W**D**N**R**D**E**V**I**V**FP**L**AK**R**F**T**W**L**A**C**R**L**F**M**S  
 CYP716A16-Cp **KPEALQRYI**GIM**D**G**I**AQ**R**HE**E**S**G**W**E**N**K**E**V**K**V**FP**L**AK**S**Y**T**W**L**I**A**C**R**L**F**M**S**  
 CYP716A175 **KPEALQRYI**GIM**D**T**V**AR**R**H**F**A**E**G**W**E**N**K**K**E**V**V**V**FP**L**AK**N**Y**T**W**L**I**A**R**L**F**V**S

CYP716A2-At **MDDL**ER**V**R**L**EE**P**FT**T**V**M**I**G**V**F**S**I**P**I**D**L**P**G**T**R**F**N**RA**I**K**A**S**R**L**S**KE**V**ST**I**  
 CYP716A1-At **MED**PAR**V**R**Q**LEE**Q**F**N**T**V**AV**G**I**F**S**I**P**I**D**L**P**G**T**R**F**N**RA**I**K**A**S**R**L**R**KE**V**SA**I**  
 CYP716A20-Vv **I**DD**P**K**H**I**A**K**F**AN**P**H**L**AA**G**V**M**S**I**P**I**N**F**P**G**T**P**F**N**RA**I**KA**A**D**S**VR**K**EL**R**AI  
 CYP716A19-Vv **V**ED**D**PH**V**E**K**LA**E**PF**N**E**L**AA**G**I**A**L**P**ID**L**P**G**T**S**F**N**K**G**I**K**AS**N**L**R**KE**L**H**A**I  
 CYP716A8-Pt **M**ED**P**EE**V**Q**K**FA**K**P**F**ND**LA**AG**I**S**I**P**I**D**L**P**W**T**P**F**N**RG**V**K**A**SN**V**H**K**EL**L**K**I**  
 CYP716A14-Aa **I**ED**P**EE**V**K**H**LS**G**PF**E**K**F**AP**G**I**F**S**I**P**I**D**L**P**W**T**F**L**R**RA**I**H**A**GN**F**I**R**KE**I**I**A**I  
 CYP716A3-Pt **I**ED**P**SH**I**A**R**ES**H**PF**N**H**I**T**S**G**I**F**T**I**P**I**A**F**P**G**T**P**F**N**RA**I**K**A**T**KL**I**R**I**E**L**L**A**I  
 CYP716A6-Pt **I**ED**P**D**H**I**A**K**L**AS**P**F**N**L**V**SG**I**F**S**I**P**I**D**L**P**G**T**P**L**S**RA**I**K**A**S**T**I**R**T**E**L**F**A**I  
 CYP716A13-St **V**ED**P**N**H**V**A**K**F**AD**P**FD**V**LA**S**GL**I**S**I**P**I**D**L**P**G**T**P**F**N**RA**I**K**A**S**N**F**I**R**K**EL**V**R**I**  
 CYP716A36-Nt **V**ED**P**N**H**V**A**K**F**AD**P**F**N**V**L**AS**GL**I**S**I**P**I**D**L**P**G**T**P**F**N**RA**I**K**A**S**N**L**I**R**KE**L**L**I**  
 CYP716A12-Mt **V**ED**E**N**H**V**A**K**F**SD**P**F**Q**L**I**AA**G**I**S**L**P**I**D**L**P**G**T**P**F**N**K**A**I**K**A**S**N**F**I**R**K**EL**I**K**I**  
 CYP716A15-Vv **I**ED**P**A**H**V**A**K**F**E**K**P**F**H**V**LA**S**GL**I**T**V**P**I**D**L**P**G**T**P**F**H**RA**I**K**A**S**N**F**I**R**K**EL**R**AI  
 CYP716A17-Vv **I**ED**P**A**H**V**A**K**F**E**K**P**F**H**V**LA**S**GL**I**T**V**P**I**D**L**P**G**T**P**F**H**RA**I**K**A**S**N**F**I**R**K**EL**R**AI  
 CYP716A16-Cp **I**ED**P**N**H**VE**R**FA**E**PF**H**H**L**AS**G**V**I**S**I**P**I**D**L**P**G**T**A**F**N**R**G**I**K**A**S**N**F**I**R**K**EL**L**K**I  
 CYP716A175 **L**ED**S**VE**L**A**K**L**G**D**P**FA**V**LA**S**GL**I**S**M**PL**D**F**P**G**T**P**F**Y**K**A**I**K**A**S**N**F**I**R**E**EL**T**K**I**

CYP716A2-At **I**R**Q**R**K**E**L**K**A**G**K**V**S**VE**-Q**D**I**L**S**H**M**L**M**N**I**G**H**T---**K**DE**D**L**A**D**K**I**I**ALL**I**G  
 CYP716A1-At **V**R**Q**R**K**E**L**K**A**G**K**A**L**EE**-H**D**I**L**S**H**M**L**M**N**I**G**H**T---**K**DE**D**L**A**D**K**I**I**GL**L**I**G**  
 CYP716A20-Vv **I**K**Q**R**K**I**Q**Y**L**AG**K**SS**S**SK**H**D**I**L**S**H**M**L**T**T**D**EN**G**Q**F**L**N**E**M**D**I**A**D**K**I**L**G**L**L**I**G**  
 CYP716A19-Vv **I**K**K**R**K**M**N**L**A**D**N**K**A**ST**-Q**D**I**L**S**H**M**L**L**T**C**D**E**NG**E**Y**M**N**E**D**I**A**D**K**I**L**G**L**L**V**G**  
 CYP716A8-Pt **I**K**Q**R**K**I**D**L**A**E**N**K**A**S**P**T**-Q**D**I**L**S**H**M**L**T**A**D**D**N**G**Q**C**M**K**I**D**I**A**D**K**I**L**G**L**L**V**G**  
 CYP716A14-Aa **I**K**Q**R**K**I**D**L**A**E**G**K**A**S**P**T**-Q**D**I**L**S**Q**M**L**C**D**E**F**S**N---**T**A**E**A**D**T**A**D**V**I**I**GL**L**I**G**  
 CYP716A3-Pt **I**R**Q**R**K**K**D**L**A**E**G**K**A**S**P**T**-Q**D**I**L**S**H**M**L**L**S**N**D**A**N**G**Q**Y**M**N**E**V**E**I**A**D**K**I**I**A**L**L**I**G**  
 CYP716A6-Pt **I**K**Q**R**K**K**D**L**A**K**G**K**A**S**P**K**-Q**D**I**L**S**H**M**L**A**C**-D**E**K**A**F**M**S**E**L**D**I**A**D**T**I**L**A**L**L**A**S**  
 CYP716A13-St **I**K**Q**R**K**I**D**L**E**G**K**A**S**T**-Q**D**I**L**S**H**M**L**L**T**C**D**E**N**G**K**F**M**G**D**L**D**I**A**D**K**I**L**G**L**L**I**G**  
 CYP716A36-Nt **I**K**Q**R**K**V**D**L**A**E**G**K**A**S**P**T**-Q**D**I**L**S**H**M**L**L**T**S**D**E**N**G**K**Y**M**H**E**L**D**I**A**D**K**I**L**G**L**L**I**G**  
 CYP716A12-Mt **I**K**Q**R**R**I**D**L**A**E**G**T**A**S**P**T**-Q**D**I**L**S**H**M**L**L**T**S**D**E**N**G**K**S**M**N**E**L**N**I**A**D**K**I**L**G**L**L**I**G**  
 CYP716A15-Vv **I**K**Q**R**K**I**D**L**A**E**G**K**A**S**Q**N**-Q**D**I**L**S**H**M**L**L**A**T**D**E**D**G**C**H**M**N**E**M**E**I**A**D**K**I**L**G**L**L**I**G**  
 CYP716A17-Vv **I**K**Q**R**K**I**D**L**A**E**G**K**A**S**Q**N**-Q**D**I**L**S**H**M**L**L**A**T**D**E**D**G**C**H**M**N**E**M**E**I**A**D**K**I**L**G**L**L**I**G**  
 CYP716A16-Cp **I**K**Q**R**K**I**D**L**E**N**G**S**A**S**P**T**-Q**D**I**L**S**H**M**L**L**T**S**D**E**S**Q**F**M**S**E**L**D**I**A**D**K**I**L**G**L**L**I**G  
 CYP716A175 **I**K**Q**R**K**I**D**L**A**E**G**K**A**S**P**T**-Q**D**I**L**S**H**M**L**L**L**C**D**E**H**G**S**H**M**K**E**H**D**I**A**D**K**I**L**G**L**L**I**G**

CYP716A2-At GHDTTSIVCTFVVNYLAEFFPHIYQRVLEEQKEILNNKDVN-EKLTWEDIE  
 CYP716A1-At GHDTASIVCTFVVNYLAEFFPHVYQRVLQEQKEILKEKKEK-EGLRWEDIE  
 CYP716A20-Vv GHDTASAVITFIKYLAELEQVYNEVLKQEQMEVAVAGKKS-G-EMLDWEDIQ  
 CYP716A19-Vv GHDTASAITFIVKFLAELEPHVYDEVFKEQMEIAKSKAPG-EILLNWEDIP  
 CYP716A8-Pt GHDTASAAITFIVKYLAELEPHVYNKILEEQREIAKTKTPG-EILLNWEDIQ  
 CYP716A14-Aa GHDNASSTCAFIVKFLADLEPHIYEGVLKEQLEIAKFKAPG-EILLNWEDLS  
 CYP716A3-Pt AHDSGTACTFIVKYLAEFFPHIYEAUVYKEQAEIISKAPG-EILLNWVDIQ  
 CYP716A6-Pt AHESSTSAACAFIVKYLAELELTYNAVYKEQMKISETKAPGD-EILLNWNDDIQ  
 CYP716A13-St GHDTASSACAFIVKYLAELEPHIYQRVYTEQMEIAKSKGPG-EILLRWEDIQ  
 CYP716A36-Nt GHDTASSACTFIVKYLAEFFPHIYEGVYKEQMEIAMS KSPG-EILLNWDIDIQ  
 CYP716A12-Mt GHDTASVACTFIVKYLGELEPHIYDKVYQEQMEIAKSKPAG-EILLNWDIDLK  
 CYP716A15-Vv GHDTASAAITFLIKYMAELPHIYKVVYEQMEIANSKAPG-EILLNWDVVQ  
 CYP716A17-Vv GHDTASAAITFLIKYMAELPHIYKVVYEQMEIANSKAPG-EILLNWDVVQ  
 CYP716A16-Cp GHDTASAACTFIVKYLAELEPHIYQKVYEQMEIAKSKAAG-EMLNWDIDIQ  
 CYP716A175 GHDTASATCTFIVKYLAELEPHIYDEVYKEQMEVLSAKAPG-EILLNWDIDLQ

351 400  
 CYP716A2-At KMRYSWNVACEVMRIVPPLAGTFREAI DHEFSFKGFYIPKGWK-LYWSATA  
 CYP716A1-At KMRYSWNVACEVMRIVPPLSGTFREAI DHEFSFKGFYIPKGWK-LYWSATA  
 CYP716A20-Vv KMKYSWNVANEMVRLAPPLQGSFREAITDFTYAGFSIPKGWKFLYWSTNA  
 CYP716A19-Vv KMRYSWNVACEVMRLAPPVQGFREAMNDFLEGGFSIPKGWK-LYWSTHS  
 CYP716A8-Pt KMRYSWNVACEVMRVAPPLOQAFREAMTEFNAGFTIPKGWK-LYWSANT  
 CYP716A14-Aa KMKYSWNVACEVLRRLAPPLQGSFREAMTDFVYNGYSIPKGWK-LYWSALS  
 CYP716A3-Pt KMKYSWNVACEVTLRLSPFFICNFKEAIKDFTFNGFAIPKGWKASHFLTLTY  
 CYP716A6-Pt NMTYSWNVIREVLRRLCPTTFP-NVREAIHDEDFNGFSIPKGWKAKYFP---  
 CYP716A13-St KMKYSWNVACEVLRRLAPPLQGFREALSDFTFNGFSIPKGWK-LYWSANS  
 CYP716A36-Nt KMKYSWNVACEVLRRLASPLQGFREAINDFTFNGFYIPKGWK-LYWSANS  
 CYP716A12-Mt KMKYSWNVACEVMRLSPPLQGGFREAITDFEMNGFSIPKGWK-LYWSANS  
 CYP716A15-Vv NMRYSWNVACEVMRLAPPLQGFREAITDFVFNFGFSIPKGWK-LYWSANS  
 CYP716A17-Vv KMRYSWNVACEVMRLAPPLQGFREAITDFVFNFGFSIPKGWK-LYWSANS  
 CYP716A16-Cp KMKYSWNVACEVLRRLAPPLQGFRAQALYDFLFDGFSIPKGWK-LYWSANS  
 CYP716A175 KMKYSWNVACEVLRRLAPPLQGFREALSDFVFNFGFTIPKGWK-LYWSANS

401 450  
 CYP716A2-At THK-----NPEYFPEPEKFDPSRFEGSGPKPYTYVFPFGGSSRIICPGREYA  
 CYP716A1-At THM-----NPDYFPEPERFENRFEGSGPKPYTYVFPFGGSPRMCPGKEYA  
 CYP716A20-Vv THK-----NPDYFPDPEKFDPSRFEGNGPIPYTYVFPFGGSPRMCPGKEYA  
 CYP716A19-Vv THR-----NPEEFPKPEKFDPSRFDGKGPAPYTYVFPFGGSPRMCPGKEYA  
 CYP716A8-Pt THK-----NPECFPEPENFDPSRFEGNGPAPYTFVFPFGGSPRMCPGKEYA  
 CYP716A14-Aa THK-----NPEVTFEPQKLDPSRFDGKGPAPYTFVFPFGGSPRMCPGKEYA  
 CYP716A3-Pt WSASSTHKNPEYFSPEKFDPSRFEGKGPAPYTFIFPFGGSPRMCPGNEYA  
 CYP716A6-Pt -----EPERFDPSRFEGTGPAPYTFVFPFGGSPMCPGQGFPA  
 CYP716A13-St THK-----SGEFPDPPEKFDPSRFEGSGPAPYTFVFPFGGSPRMCPGKEYA  
 CYP716A36-Nt THK-----NPEYFPEPQKFDPSRFEGSGPAPYTFVFPFGGSPRMCPGKEYA  
 CYP716A12-Mt THK-----NAECFPMPEKFDPTRFEGNGPAPYTFVFPFGGSPRMCPGKEYA  
 CYP716A15-Vv THK-----SPECFQPENFDPTRFEGNGPAPYTFVFPFGGSPRMCPGKEYA  
 CYP716A17-Vv THK-----SPECFQPENFDPTRFEGDGPAPYTFVFPFGGSPRMCPGKEYA  
 CYP716A16-Cp THK-----DPECFPEPEKFDPTRFEGNGPAPYTFVFPFGGSPRMCPGKEYA  
 CYP716A175 THK-----NAALFPEPFKFDPTRFEGNGPAPYTFVFPFGGSPRMCPGKEYA

451 502  
 CYP716A2-At RLEILIFMHNLVKRFKWEKVFENENKLVADFAFIPAKGLPT-----  
 CYP716A1-At RLEILIFMHNLVNRFKWEKVFENENKIVDPLFIPDKGLPT-----  
 CYP716A20-Vv RLEILVFIHNVRRFSWYKIHENE-DVIVDEMPMPAKGLPTIRLRHH-----  
 CYP716A19-Vv RLEVLVFMHNLVRRFKWEKLLPDE-KIIVDEMPIPAKGLPTIRLHHHQP----  
 CYP716A8-Pt RLEILVFLHNLVKKFRWEKLLFKE-RIIVDPMPIPSKGLPTIRLHPHEAA---  
 CYP716A14-Aa RLEILVFMHHLVIKWKWKVLENE-QIIVNPMKLAAGLPLRLYPRYA----  
 CYP716A3-Pt RLEILVFMHNLVKRFKFERLVLDE-KIVFDETFKPERGLPVRLPHKA----  
 CYP716A6-Pt RLEMLIFMHNLVKRFKDFKFALE-KIMFSEMPIPEKGVPIRLFPHRP----  
 CYP716A13-St RLEILVFMHHLVKKRFKFKIIPDE-KIIVNPMPIPAKGLPVRLYPHHPK---  
 CYP716A36-Nt RLEILVFMHHLVKKRFKWEKVIENE-KIIVDEMPIPAKGLPVRLYPHKA----  
 CYP716A12-Mt RLEILVFMHNLVKRFKWEKVIIPDE-KIIVDEFPPIPAKDLPTIRLYPHKA----  
 CYP716A15-Vv RLEILVFMHNVKRFKWKLLPDE-KIIVDEMPMPAKGLPVRLHPHKP----  
 CYP716A17-Vv RLEILVFMHNVKRFKWKLLPDE-KIIVDEMPMPAKGLPVRLHRKPK----  
 CYP716A16-Cp RLEILVFMHNVKRFKWEKVIIPDE-KIIVDEMPVPAKGLPVRLYPHAHAL--  
 CYP716A175 RLEILVFMHNLVKKRFKWEKVIIPDE-QIIVDPLFMPAKGLPVRLFPHPKTATT

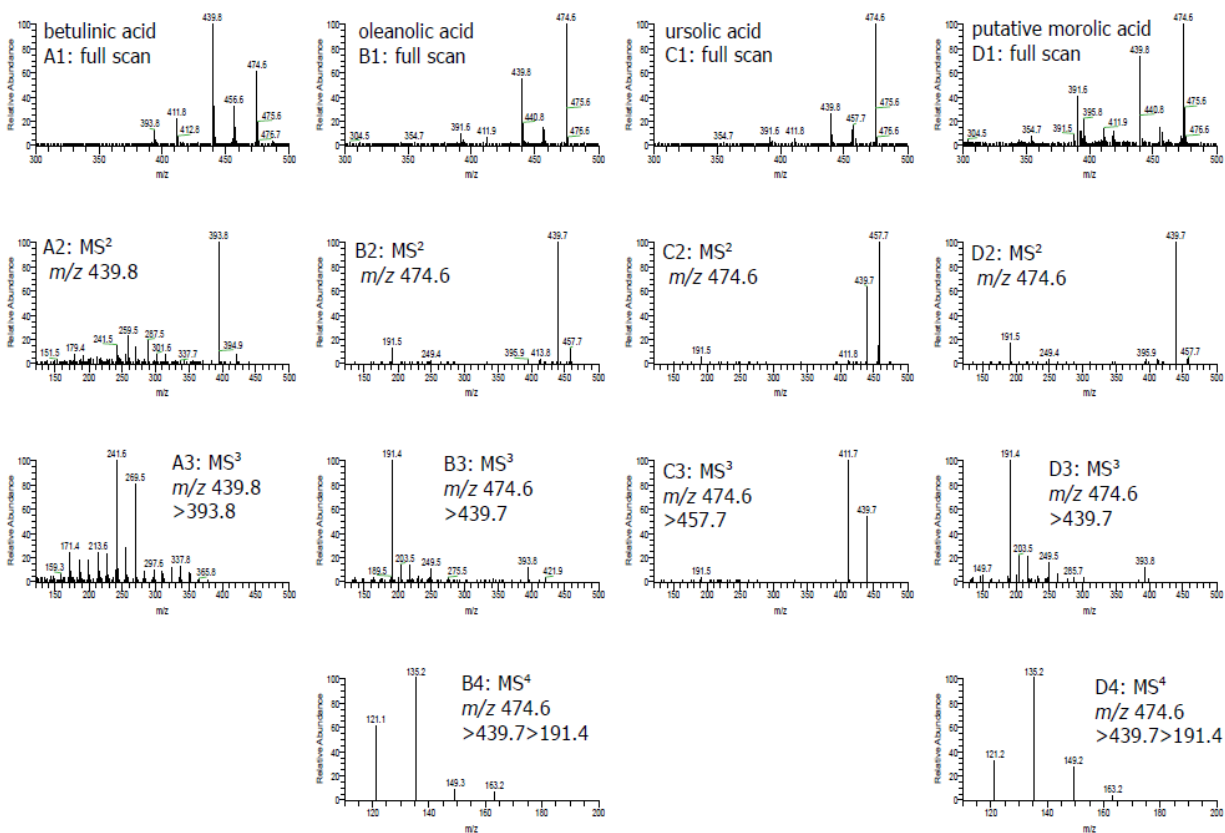

**Fig. S6** Mass spectra comparison (MS1, MS2, and MS3) between betulinic acid, ursolic acid, oleanolic acid, and a putative morolic acid.

## References

- Brendolise C, Yauk Y-K, Eberhard ED, Wang M, Chagne D, Andre C, Greenwood DR, Beuning LL. 2011.** An unusual plant triterpene synthase with predominant  $\alpha$ -amyrin-producing activity identified by characterizing oxidosqualene cyclases from *Malus*  $\times$  *domestica*. *FEBS Journal* **278**: 2485–2499.
- Giorno F, Guerriero G, Baric S, Mariani C. 2012.** Heat shock transcriptional factors in *Malus domestica*: identification, classification and expression analysis. *BMC Genomics* **13**: 639.
- Malladi A, Hirst PM. 2010.** Increase in fruit size of a spontaneous mutant of “Gala” apple (*Malus*  $\times$  *domestica* Borkh.) is facilitated by altered cell production and enhanced cell size. *Journal of Experimental Botany* **61**: 3003–3013.
